# Supplementary material for: Redefining environmental nanomaterial flows: consequences of the regulatory nanomaterial definition on the results of environmental exposure models
Source: Royal Society of Chemistry journal article supplement (doi:10.1039/c8en00137e), 2018-01-01
Supplement: c8en00137e1.pdf [file c8en00137e1.pdf]

1 - **Supporting Information** -

2

3

4

5 **Redefining environmental nanomaterial flows: Consequences of the**  
6 **regulatory nanomaterial definition on the results of environmental**  
7 **exposure models**

8

9 Henning Wigger<sup>1\*</sup>, Wendel Wohlleben<sup>2</sup>, Bernd Nowack<sup>1</sup>

10

11 1) Empa, Swiss Federal Laboratories for Materials Science and Technology, Technology and Society  
12 Laboratory, Lerchenfeldstrasse 5, 9014 St. Gallen, Switzerland

13 2) BASF SE, Dept. Material Physics, RAA/OR - B7, Carl-Bosch-Strasse 38, 67056 Ludwigshafen am Rhein,  
14 Germany

15 \*corresponding author:

16 contact [henning.wigger@googlemail.com](mailto:henning.wigger@googlemail.com)

17

18

19

20

21

22

23

24

25

26

27

28

**Table S1. Assumed transfer coefficients for the product categories for each compartment.**

| Substance form<br>(main application<br>according to Glauser<br>et al (2014) <sup>1</sup>                    | Transfer coefficients |       |          |         |        |                  |                |                    |         |               |  | Reference                                                                                                                  | Remark                                                                                                                                                                                                                                                                                                          |  |
|-------------------------------------------------------------------------------------------------------------|-----------------------|-------|----------|---------|--------|------------------|----------------|--------------------|---------|---------------|--|----------------------------------------------------------------------------------------------------------------------------|-----------------------------------------------------------------------------------------------------------------------------------------------------------------------------------------------------------------------------------------------------------------------------------------------------------------|--|
|                                                                                                             | Waste-<br>water       | WIP   | Landfill | Air     | Soil   | Surface<br>water | Cement<br>kiln | Recycling /<br>WMS | Export  | Bio-<br>waste |  |                                                                                                                            |                                                                                                                                                                                                                                                                                                                 |  |
| Precipitated silica                                                                                         |                       |       |          |         |        |                  |                |                    |         |               |  |                                                                                                                            |                                                                                                                                                                                                                                                                                                                 |  |
| Elastomeres<br>(green tires<br>filler as reinforcing<br>agent)                                              | 0.0748                | 0.036 | 0.016    | 0.01497 | 0.0604 |                  | 0.36476        | 0.31895            | 0.07193 |               |  | End-of-life: (ETRMA 2015) <sup>2</sup><br>Air: (Harrison et al. 2012) <sup>3</sup>                                         | silica is used as a substitute for carbon<br>black,<br>wear of tires is 10-20%; (Milani et al.<br>2004) <sup>4</sup><br>silica is used 5-15 % (Wik and Dave 2009)<br><sup>5</sup><br>unknown fraction mentioned in ETRMA<br>(2015) <sup>2</sup> was distributed equally between<br>the compartments considered. |  |
| Detergents and<br>Cosmetics<br>(e.g. as powder agent)                                                       | 0.8                   | 0.15  | 0.03     | 0.02    |        |                  |                |                    |         |               |  | (Wang et al. 2016) <sup>6</sup> adapted<br>from categories "Cosmetics,<br>personal care" with Kumar<br>(2005) <sup>7</sup> | No sun lotion -> no direct entry to<br>surface waters                                                                                                                                                                                                                                                           |  |
| Carrier materials<br>(agricultural and<br>animal feeds)                                                     |                       |       |          |         | 1      |                  |                |                    |         |               |  | own assumption<br>Function: anti-caking<br>-> fertilizer or soil application                                               | nano-SiO <sub>2</sub> is not bioaccumulated and<br>released accordingly.                                                                                                                                                                                                                                        |  |
| Polymers and<br>Plastics (Plastics: battery<br>plates, PVC flooring,<br>fillers in plastics,<br>Anticaking) |                       | 0.32  | 0.68     |         |        |                  |                |                    |         |               |  | (Wang et al. 2016) <sup>6</sup> category<br>polymers                                                                       |                                                                                                                                                                                                                                                                                                                 |  |
| Sealants                                                                                                    | 0.015                 | 0.9   | 0.085    |         |        |                  |                |                    |         |               |  | (Wang et al. 2016) <sup>6</sup> category<br>"Adhesive + sealants"<br>Tolls et al., 2016 <sup>8</sup>                       |                                                                                                                                                                                                                                                                                                                 |  |
| Paints, coatings and<br>ink                                                                                 | 0.05                  |       | 0.2      |         | 0.1    | 0.05             |                | 0.6                |         |               |  | (Wang et al. 2016) <sup>6</sup> category<br>Paints coatings inks and<br>toners                                             | Disposed as aggregates with construction<br>and demolition waste                                                                                                                                                                                                                                                |  |
| Other (sealants, paints,<br>coatings, inks and<br>miscellaneous uses)                                       | 0.2                   | 0.75  | 0.025    |         |        | 0.025            |                |                    |         |               |  | (Wang et al. 2016) <sup>6</sup>                                                                                            |                                                                                                                                                                                                                                                                                                                 |  |

**Table S1 continued.**

| Colloidal silica                                                                                                                                                                                 |      |      |       |      |  |  |       |      |     |      |                                                                                                   |                                                                       |
|--------------------------------------------------------------------------------------------------------------------------------------------------------------------------------------------------|------|------|-------|------|--|--|-------|------|-----|------|---------------------------------------------------------------------------------------------------|-----------------------------------------------------------------------|
| Refractory Binders (ceramics)                                                                                                                                                                    | 0.01 | 0.15 | 0.25  |      |  |  |       | 0.59 |     |      | (Wang et al. 2016) <sup>6</sup> category: stone, cement, glass, putties, modeling clay            |                                                                       |
| Investment casting (ceramics)                                                                                                                                                                    |      | 0.32 | 0.67  | 0.01 |  |  |       |      |     |      | (Wang et al. 2016) <sup>6</sup> category composite and alloys                                     |                                                                       |
| Pulp and paper (anti-slip / less sticking)                                                                                                                                                       |      | 0.03 | 0.07  |      |  |  |       | 0.7  | 0.2 |      | (Sun et al. 2016) <sup>9</sup>                                                                    |                                                                       |
| Electronics (wafer polishing)                                                                                                                                                                    | 0.05 |      | 0.95  |      |  |  |       |      |     |      | (Wang et al 2016) <sup>6</sup> (Electrical / electronic products -> slurry/paste, industrial use) | microfiltration on site                                               |
| Beverage clarification (own: flocculation agent)                                                                                                                                                 | 0.01 |      |       |      |  |  |       |      |     | 0.99 | Own assumption, see beer fining category                                                          |                                                                       |
| Textile processing                                                                                                                                                                               | 0.99 |      |       | 0.01 |  |  |       |      |     |      | (Wang et al. 2016) <sup>6</sup>                                                                   |                                                                       |
| Other (batteries (electrolyte), catalysts, concrete, cosmetics, leather treatment, pigment formulations, plastic additive, refractory, adhesives, cleaning products, other (paint, epoxy resin)) | 0.2  | 0.75 | 0.025 |      |  |  | 0.025 |      |     |      | (Wang et al. 2016) <sup>6</sup> category adhesive and sealants                                    | simplified assumption due to use in many different product categories |

**Table S1 continued.**

| Silica gel                                                       |                |          |          |     |      |  |  |  |          |          |                                                                                                  |  |
|------------------------------------------------------------------|----------------|----------|----------|-----|------|--|--|--|----------|----------|--------------------------------------------------------------------------------------------------|--|
| Beer fining                                                      | 0.01           |          |          |     |      |  |  |  |          | 0.99     | own assumption based on (Leiper et al. 2002) <sup>10</sup>                                       |  |
| Other food                                                       | 0.9            | 0.05     | 0.05     |     |      |  |  |  |          |          | (Wang et al. 2016) <sup>6</sup> category Food products                                           |  |
| Adsorbents and Desiccants (Compete with molecular sieves)        |                | 0.5      | 0.5      |     |      |  |  |  |          |          | Own assumption                                                                                   |  |
| Paints and coatings (Flattening agents)                          | 0.05           |          | 0.2      | 0.1 | 0.05 |  |  |  | 0.6      |          | (Wang et al. 2016) <sup>6</sup> category paints and coatings                                     |  |
| Plastics and textiles                                            | 0.02-0.32-0.65 | Rest*0.4 | Rest*0.1 |     |      |  |  |  | Rest*0.1 | Rest*0.4 | (Wang et al. 2016) <sup>6</sup> category clothes, shoes, polymers                                |  |
| Pharmaceutical tableting (Additive)                              | 0.9            | 0.05     | 0.05     |     |      |  |  |  |          |          | (Wang et al. 2016) <sup>6</sup> category article for health services                             |  |
| Dentrifices (Toothpastes)                                        | 0.9            | 0.05     | 0.05     |     |      |  |  |  |          |          | (Wang et al. 2016) <sup>6</sup> category article for health services of (down the drain product) |  |
| Other (catalysts, specialty paper, high-pressure chromatography) | 0.05           |          |          |     |      |  |  |  | 0.95     |          | (Wang et al. 2016) <sup>6</sup> category catalysts                                               |  |

**Table S1 continued.**

| Fumed silica                                         |       |       |       |  |     |      |  |      |     |  |                                                                                             |                                                                                                                         |
|------------------------------------------------------|-------|-------|-------|--|-----|------|--|------|-----|--|---------------------------------------------------------------------------------------------|-------------------------------------------------------------------------------------------------------------------------|
| Silicone elastomers                                  | 0.015 | 0.9   | 0.085 |  |     |      |  |      |     |  | Based on (Wang et al. 2016) <sup>6</sup> category sealants (Tolls et al. 2016) <sup>8</sup> | Silicone elastomers are mainly used in machinery, automotive, construction                                              |
| other silicones (own: silica gel, fluids, resins)    |       | 0.2   |       |  |     |      |  | 0.8  |     |  | (Wang et al. 2016) <sup>6</sup> category Lubricants                                         |                                                                                                                         |
| Paints and coatings                                  | 0.05  |       | 0.2   |  | 0.1 | 0.05 |  |      | 0.6 |  | (Wang et al. 2016) <sup>6</sup> category paints and coatings                                | Disposed as aggregates with construction and demolition waste                                                           |
| Polyester resins                                     |       | 0.75  | 0.25  |  |     |      |  |      |     |  | Eurostat, 2013 <sup>11</sup>                                                                | average distribution of waste in the EU;                                                                                |
| Adhesives and sealants                               | 0.015 | 0.9   | 0.085 |  |     |      |  |      |     |  | Based on (Wang et al. 2016) <sup>6</sup> category sealants (Tolls et al. 2016) <sup>8</sup> |                                                                                                                         |
| Epoxy resins (own: coatings, adhesives, electronics) | 0.015 | 0.9   | 0.085 |  |     |      |  |      |     |  | Based on (Wang et al. 2016) <sup>6</sup> category sealants (Tolls et al. 2016) <sup>8</sup> | many different industries                                                                                               |
| Industrial inks                                      | 0.015 | 0.735 | 0.25  |  |     |      |  |      |     |  | Eurostat 2013 <sup>11</sup> own assumption based on (Tolls et al. 2016) <sup>8</sup>        | average distribution of waste in the EU; wastewater: worst-case for dispersive use cf. (Tolls et al. 2016) <sup>8</sup> |
| Other (planarization of metals and dielectric films) |       | 0.05  | 0.1   |  |     |      |  | 0.65 | 0.2 |  | (Wang et al 2016) <sup>6</sup> electronic products                                          |                                                                                                                         |

## References

1. J. Glauser, S. Wietlisbach and C. Funada, *Chemical economics handbook - Silicates and silicas*, IHS markit, London, United Kingdom, 2014.
2. ETRMA, *End-of-life Tyre Report*, European Tyre and Rubber manufactures' Association (ETRMA), Brussels, Belgium, 2015.
3. R. M. Harrison, A. M. Jones, J. Gietl, J. Yin and D. C. Green, Estimation of the contributions of brake dust, tire wear, and resuspension to nonexhaust traffic particles derived from atmospheric measurements, *Environmental science & technology*, 2012, **46**, 6523-6529.
4. M. Milani, F. P. Pucillo, M. Ballerini, M. Camatini, M. Gualtieri and S. Martino, First evidence of tyre debris characterization at the nanoscale by focused ion beam, *Materials Characterization*, 2004, **52**, 283-288.
5. A. Wik and G. Dave, Occurrence and effects of tire wear particles in the environment-a critical review and an initial risk assessment, *Environmental pollution*, 2009, **157**, 1-11.
6. Y. Wang, A. Kalinina, T. Sun and B. Nowack, Probabilistic modeling of the flows and environmental risks of nano-silica, *Science of the total environment*, 2016, **545-546**, 67-76.
7. S. Kumar, Exploratory analysis of global cosmetic industry: major players, technology and market trends, *Technovation*, 2005, **25**, 1263-1272.
8. J. Tolls, D. Gomez, W. Guhl, T. Funk, E. Seger and T. Wind, Estimating emissions from adhesives and sealants uses and manufacturing for environmental risk assessments, *Integrated environmental assessment and management*, 2016, **12**, 185-194.
9. T. Y. Sun, N. A. Bornhoft, K. Hungerbuhler and B. Nowack, Dynamic probabilistic modeling of environmental emissions of engineered nanomaterials, *Environmental science & technology*, 2016, **50**, 4701-4711.
10. K. A. Leiper, R. Duszanskyj and G. G. Stewart, Premixing of isinglass and silica gel to obtain improved beer stability, *J. Inst. Brew.*, 2002, **108**, 28-32.
11. Eurostat, Municipal waste generation and treatment, by type of treatment method, <http://ec.europa.eu/eurostat/web/environment/waste/main-tables>, (accessed October 18th, 2017).
